# Supplementary material for: Validation of the Substance Use Risk Profile Scale (SURPS) and associated factors among adolescents in Chile
Source: Research Square preprint supplement (doi:10.21203/rs.3.rs-8663600/v1), 2026-02-23
Supplement: Supplementary file 1 [file 75cafec0ae8bda4e4934d02a.docx]

Suppl. 1, Table 1: Association between SURPS subscales and substance use and positive and negative beliefs about substance use and refusal skills.

| Variables | Lifetime Tobacco use | | | Lifetime Alcohol use | | | Lifetime Marijuana use | | | |
| --- | --- | --- | --- | --- | --- | --- | --- | --- | --- | --- |
| OR | [95% CI] | p-value | OR | [95% CI] | p-value | OR | [95% CI] | p-value |
| SURPS Total | 1.07 | [1.05-1.10] | **0.000** | 1.06 | [1.04-1.07] | 0.000 | 1.09 | [1.06-1.12] | **0.000** |
| Hopelessness | 1.09 | [1.05-1.12] | **0.000** | 1.06 | [1.03-1.09] | 0.000 | 1.09 | [1.06-1.13] | **0.000** |
| Anxiety Sensitivity | 1.02 | [0.98-1.07] | 0.384 | 1.00 | [0.97-1.03] | 0.854 | 1.00 | [0.94-1.10] | 0.882 |
| Impulsivity | 1.14 | [1.09-1.20] | **0.000** | 1.10 | [1.06-1.14] | 0.000 | 1.16 | [1.09-1.24] | **0.000** |
| Sensation Seeking | 1.10 | [1.04-1.15] | **0.000** | 1.09 | [1.06-1.12] | 0.000 | 1.13 | [1.06-1.19] | **0.000** |

Note: OR = odds ratio; CI = Confidence Interval; p-value ≤ 0.05 are in bold.

Suppl. 1, Table 2: Association between SURPS subscales and positive beliefs about substance use.

| Variables | Positive beliefs about Tobacco use | | | Positive beliefs about Alcohol use | | | Positive beliefs about Marijuana use | | |
| --- | --- | --- | --- | --- | --- | --- | --- | --- | --- |
| β | [95% CI] | p-value | β | [95% CI] | p-value | β | [95% CI] | p-value |
| SURPS Total | 0.03 | [0.02-0.05] | **0.000** | 0.05 | [0.03-0.07] | **0.000** | 0.05 | [0.03-0.07] | **0.000** |
| Hopelessness | 0.05 | [0.02-0.07] | **0.001** | 0.05 | [0.02-0.09] | **0.004** | 0.07 | [0.04-0.09] | **0.000** |
| Anxiety Sensitivity | 0.02 | [-0.01-0.06] | 0.196 | 0.04 | [-0.01-0.09] | 0.115 | 0.03 | [-0.01-0.07] | 0.145 |
| Impulsivity | 0.08 | [0.04-0.12] | **0.000** | 0.10 | [0.05-0.16] | **0.000** | 0.09 | [0.05-0.13] | **0.000** |
| Sensation Seeking | 0.01 | [-0.02-0.04] | 0.594 | 0.04 | [-0.01-0.08] | 0.120 | 0.03 | [-0.00-0.07] | 0.066 |

Note: β = Unstandardized Beta coefficient.; CI = Confidence Interval; p-value ≤ 0.05 are in bold.

Suppl. 1, Table 3: Association between SURPS subscales and negative beliefs about substance use.

| Variables | Negative beliefs about Tobacco use | | | Negative beliefs about Alcohol use | | | Negative beliefs about Marijuana use | | |
| --- | --- | --- | --- | --- | --- | --- | --- | --- | --- |
| β | [95% CI] | p-value | β | [95% CI] | p-value | β | [95% CI] | p-value |
| SURPS Total | -0.02 | [-0.04-0.00] | **0.050** | -0.03 | [-0.05- -0.01] | **0.001** | -0.04 | [-0.06- -0.02] | **0.001** |
| Hopelessness | -0.05 | [-0.09- -0.02] | **0.004** | -0.05 | [-0.08- -0.02] | **0.000** | -0.08 | [-0.12- -0.04] | **0.000** |
| Anxiety Sensitivity | 0.03 | [-0.01-0.08] | 0.162 | 0.02 | [-0.02-0.06] | 0.391 | 0.03 | [-0.02-0.08] | 0.271 |
| Impulsivity | -0.07 | [-0.12- -0.14] | **0.014** | -0.07 | [-0.12- -0.03] | **0.001** | -0.12 | [-0.18- -0.07] | **0.000** |
| Sensation Seeking | -0.02 | [-0.06-0.03] | 0.470 | -0.04 | [-0.08- -0.00] | **0.037** | -0.04 | [-0.09-0.01] | 0.089 |

β = Unstandardized Beta coefficient.; CI = Confidence Interval; p-value ≤ 0.05 are in bold.

Suppl. 1, Table 4: Association between SURPS subscales and Normative beliefs about substance use.

| Variables | Normative beliefs of Tobacco use | | | Normative beliefs of drunkenness | | | Normative beliefs of drug use | | |
| --- | --- | --- | --- | --- | --- | --- | --- | --- | --- |
| β | [95% CI] | p-value | β | [95% CI] | p-value | β | [95% CI] | p-value |
| SURPS Total | 0.01 | [0.01-0.02] | **0.000** | 0.01 | [0.01-0.02] | **0.000** | 0.01 | [0.01-0.02] | **0.000** |
| Hopelessness | 0.01 | [0.01-0.02] | **0.000** | 0.01 | [0.01-0.02] | **0.000** | 0.02 | [0.01-0.03] | **0.000** |
| Anxiety Sensitivity | -0.00 | [-0.01-0.01] | 0.576 | 0.00 | [-0.01-0.01] | 0.604 | 0.01 | [-0.00-0.02] | 0.166 |
| Impulsivity | 0.01 | [0.00-0.03] | **0.014** | 0.02 | [0.01-0.03] | **0.000** | 0.02 | [0.01-0.03] | **0.001** |
| Sensation Seeking | 0.02 | [0.01-0.03] | **0.000** | 0.01 | [0.01-0.02] | **0.002** | 0.01 | [0.00-0.02] | **0.007** |

β = Unstandardized Beta coefficient.; CI = Confidence Interval; p-value ≤ 0.05 are in bold.

Suppl. 1, Table 5: Association between SURPS subscales and refusal skills.

| Variables | Refusal skills Tobacco | | | Refusal skills Alcohol | | | Refusal skills Marijuana | | |
| --- | --- | --- | --- | --- | --- | --- | --- | --- | --- |
| β | [95% CI] | p-value | β | [95% CI] | p-value | β | [95% CI] | p-value |
| SURPS Total | -0.03 | [-0.03- -0.02] | **0.000** | -0.03 | [-0.03- -0.02] | **0.000** | -0.03 | [-0.03- -0.02] | **0.000** |
| Hopelessness | -0.04 | [-0.05- -0.04] | **0.000** | -0.03 | [-0.04- -0.03] | **0.000** | -0.05 | [-0.05- -0.04] | **0.000** |
| Anxiety Sensitivity | -0.01 | [-0.02-0.00] | 0.072 | -0.01 | [-0.02-0.01] | 0.272 | -0.01 | [-0.02-0.00] | 0.097 |
| Impulsivity | -0.05 | [-0.07- -0.03] | **0.000** | -0.05 | [-0.06- -0.03] | **0.000** | -0.05 | [-0.06- -0.04] | **0.000** |
| Sensation Seeking | -0.02 | [-0.03- -0.01] | **0.000** | -0.03 | [-0.04- -0.02] | **0.000** | -0.02 | [-0.04- -0.01] | **0.000** |

β = Unstandardized Beta coefficient.; CI = Confidence Interval; p-value ≤ 0.05 are in bold.

Suppl. 2, Table 1: Results of Horn's Parallel Analysis

| Factors | Eigenvalue |
| --- | --- |
| 1 | 5.55 |
| 2 | 4.85 |
| 3 | 1.81 |
| 4 | 1.12 |

Suppl. 2, Table 2: Account of variance after rotation

| Factors | Proportion |
| --- | --- |
| 1 | 0.22 |
| 2 | 0.11 |
| 3 | 0-10 |
| 4 | 0.09 |
| Total | 0.52 |
